# Supplementary material for: Genome-scale investigation of phenotypically distinct but nearly clonal Trichoderma strains
Source: PeerJ. 2016 May 12;4:e2023. doi: 10.7717/peerj.2023 (PMC4868595; doi:10.7717/peerj.2023)
Supplement: Table S2 — Underlined are additional sequences to introduce restriction sites, ∗ Introducing sfiI restriction sites, † previously designed within our group. [file peerj-04-2023-s008.xlsx]

## Sheet: Sheet1
Supplementary Table S2. Primers.
Section	Primer	Sequence (5’-3’)	Gene/Locus	Fragment length	Annealing temperature
SNP confirmation	SNP1-F	CCAAGGTACGCTGAAATCACC	SNP1	660 bp	60°C
	SNP1-R	AACGGCCAAGTAACCACGAC
	SNP2-F	TGCTGTCCAACCTCGAAAGTC	SNP2	1143 bp	60°C
	SNP2-R	AAACGCCGGCAAACGAGT
RT-qPCR	tef-F	GACATTGCCCTCTGGAAGTT	tef1 (Reference gene)	110 bp	60°C
	tef-R	GTCAGCCTGGGAAGTACCA
	nag1-F	GATCACAACTGGAGACAGCG	nag1	91 bp	60°C
	nag1-R	CGGGTTGTAGCCGATTGT
	nag2-F	TGGGGTATAAAGTCATTGACAG	nag2	109 bp	60°C
	nag2-R	AAGGGGTAGTTGTTCTGGAAG
	serf-F	TGCCAAGAAGGAGGCTACC	serf (Containing SNP1)	104 bp	60°C
	serf-R	CCATTTGTTTCTGTCGCATC
	pcna-F	GTGGTGTATGAAGAAACGCCT	pcna (Containing SNP2)	105 bp	60°C
	pcna-R	ACGACTGGAAATCGGGAGT
Transcript analysis	serf-5’	CCATCATGACCCGTGGAA	serf	457 bp	55°C
	serf-3’	TATTGCCGTTGCCATTGG
	pcna-5’	TGCTGTCCAACCTCGAAAGTC	pcna	1143 bp	59°C
	pcna-rev	AAACGCCGGCAAACGAGT
Gene deletion	SKOLF-F	CATGCTGAGATGATGCCGTCG	Left flank	1000 bp	62°C
	SKOLF-R *	TAAGGCCATCTAGGCCGATGGCGCCGGTAGGAGCTGG
	SKORF-F *	ATTGGCCTGAGTGGCCAAACCAGACCTGGGAGAGGCG	Right flank	1000 bp	62°C
	SKORF-R	CGAACTACTTACGAATCCCAGG
	SKON-Xba	AGGTCTCTAGACCAATGTTTGATCCAGGCCAATAGA	SKO	3424 bp	62°C
	SKON-Xho	GTAATCTCGAGAATGGGGAAATCGCCATTGTGAGGA
	YT6-Xba †	AGGTCTCTAGACCAATCCGCAATGTGTTATTAAGTTGTC	pYT6 backbone	6400 bp	62°C
	YT6-Xho †	GTAATCTCGAGAATGGGTCATCTATGTTACTAGATCGGG
	checkA	AACGCTCTGTCATCGTTACA	SKO in pSKO	4000 bp	56°C
	checkB	TTAGGACTTGTGCGACATGT
Confirmation of homologous recombination	A	AATCGCAGCAGCTGAAGCTC	Whole region in WT (A - B)	2.6 kb	63°C
			Whole region in Δserf (A - B)	3.6 kb	63°C
			SKO Left Flank in WT (A - C)	-	66°C
			SKO Left Flank in Δserf (A - C)	1.6 kb	66°C
	B	CAGTAGCATGGGCCCGAAGA	SKO Right Flank in WT (B - D)	-	60°C
			SKO Right Flank in Δserf (B - D)	1.4 kb	60°C
			serf in WT (B - SNP1-F)	1.4 kb	64°C
			serf in Δserf (B - SNP1-F)	-	64°C
	C	CAGAAACTTCTCGACAGACG	SKO Left Flank (see A)
	D	CTATCAGAGCTTGGTTGACG	SKO Right Flank (see B)
	SNP1-F	CCAAGGTACGCTGAAATCACC	serf (see B)
	Hph-F	TCGCCAACATCCTCTTCTG	hph in mutants (probe)	311 bp	60°C
	Hph-R	GGCGTCGGTTTCCACTATC
Underlined are additional sequences to introduce restriction sites.
* Introducing sfiI restriction sites
† previously designed within our group
