# Supplementary material for: Genome-scale investigation of phenotypically distinct but nearly clonal Trichoderma strains
Source: PeerJ. 2016 May 12;4:e2023. doi: 10.7717/peerj.2023 (PMC4868595; doi:10.7717/peerj.2023)
Supplement: Table S3 — Different letters represent significantly different values (P < 0.05) for each experiment or for each row (as indicated). The biggest differences between isolates is highlighted in bold. ∗ The actual pH of the plates was measured before inoculation using a flat tip pH probe. [file peerj-04-2023-s009.xlsx]

## Sheet: Sheet1
Supplementary Table S3. Average growth rates (mm/d) of LU132 and LU140.
Exp #	Medium	pH	Buffering	Dark				Light				l.s.d.
				LU132		LU140		LU132		LU140
Exp 1	PDA	5	unbuffered	27.1	ab	20.9	c	19.8	cd	16.7	ef	2.906
	MEA	5	unbuffered	25	b	21.9	c	20.9	c	17.7	de
	MMA	5	unbuffered	30	a	28	a	16.6	ef	14.8	f
	Average			27.3667		23.6		19.1		16.4
Exp 2	PDA	5	unbuffered	24.8	a	21	d					0.997
	MEA	5	unbuffered	23.3	b	22.3	c
	MMA	5	unbuffered	22.3	c	20.3	d
	Average			23.4667		21.2
Exp 3 *	PDA	2.9	unbuffered	20.4	a	18	b	17.3	b	15.2	c	1.51
	PDA	3.5	unbuffered	24.8	a	20.7	b	19.6	b	16.1	c	1.83
	PDA	4	unbuffered	24.7	a	18.9	c	21.9	b	17.4	d	1.12
	PDA	4.7	unbuffered	25	a	18.9	c	21.4	b	20.1	bc	1.5
	PDA	5.2	unbuffered	24	a	19.6	bc	20.8	b	18.5	c	1.46
	PDA	5.6	unbuffered	21.5	a	18.9	b	20.6	ab	16.7	c	1.86
	PDA	5.9	unbuffered	20.4	a	17.3	c	18.6	b	15.4	d	1.19
	PDA	2.7	buffered	17.2	a	15.2	b	13.8	c	12.3	d	1.29
	PDA	3.2	buffered	20.5	a	18.7	b	19.8	a	16.5	c	0.86
	PDA	3.8	buffered	21.8	a	19.6	b	19.7	b	16.9	c	1.27
	PDA	4.4	buffered	17.7	a	16.2	b	16.3	b	13.9	c	0.71
	PDA	4.9	buffered	14.3	a	13	ab	13.9	a	11.6	b	1.89
	PDA	5.5	buffered	13.1	a	9.8	b	12.7	a	10.9	b	1.41
	PDA	6	buffered	10.9	a	8.7	bc	9.7	ab	7.6	c	1.64
	Average			19.7357		16.6786		17.5786		14.9357
Exp 4 *	PDA (colony 1)	4.7	unbuffered	24	a	21	b					1.21
	PDA (colony 2)	4.7	unbuffered	24.6	a	21.9	b
	PDA (colony 3)	4.7	unbuffered	24	a	21.9	b
	PDA (colony 4)	4.7	unbuffered	24.9	a	21.6	b
	PDA (colony 5)	4.7	unbuffered	24.9	a	22.2	b
	PDA (colony 6)	4.7	unbuffered	23.7	a	21	b
	Average			24.35		21.6
Different letters represent significantly different values (P<0.05) for each experiment or for each row (as indicated).
The biggest differences between isolates is highlighted in bold.
* The actual pH of the plates was measured before inoculation using a flat tip pH probe.
