# Supplementary material for: Genome-scale investigation of phenotypically distinct but nearly clonal Trichoderma strains
Source: PeerJ. 2016 May 12;4:e2023. doi: 10.7717/peerj.2023 (PMC4868595; doi:10.7717/peerj.2023)
Supplement: Table S4 — ∗ The same pathogen in place of the antagonist acted as control. With P. ultimum the inhibition is negative because the pathogen grew further on the treatment plate than on the control plate. The pathogen inhibition is displayed as % of pathogen growth reduction on treatment plate in relation to control plate. Different letters represent significantly different values (l.s.d. = 1.559) (P < 0.05). [file peerj-04-2023-s010.xlsx]

## Sheet: Sheet1
Supplementary Table S4. Pathogen growth in mm and inhibition (%) by LU132 and LU140 on dual culture plates.
Pathogen	Control *		LU132		LU140
P. ultimum	30.0 mm	c	30.4 mm (-1%)	c	34.0 mm (-13%)	b
B. cinerea	30.2 mm	c	20.6 mm (32%)	e	23.6 mm (22%)	d
S. cepivorum	38.6 mm	a	33.8 mm (12%)	b	37.8 mm (2%)	a
* The same pathogen in place of the antagonist acted as control.
With P. ultimum the inhibition is negative because the pathogen grew further on the treatment plate than on the control plate.
The pathogen inhibition is displayed as % of pathogen growth reduction on treatment plate in relation to control plate.
Different letters represent significantly different values (l.s.d. = 1.559) (P<0.05).
