# Supplementary material for: Genome-scale investigation of phenotypically distinct but nearly clonal Trichoderma strains
Source: PeerJ. 2016 May 12;4:e2023. doi: 10.7717/peerj.2023 (PMC4868595; doi:10.7717/peerj.2023)
Supplement: Table S5 — ∗ Average conidiation score of 95 wells of three Biolog FF plates. † Number of wells that contained conidia (or pustules). Different letters represent significantly different values (l.s.d. = 0.427 ) (P < 0.05). [file peerj-04-2023-s011.xlsx]

## Sheet: Sheet1
Supplementary Table S5. Conidiation scores and number of wells with conidia.
Hours	Average score *				Number of wells †
	LU132		LU140		LU132	LU140
60	0.28	e	0.91	d	25	37
84	1.25	cd	1.9	ab	51	65
108	1.58	bc	2.07	a	75	77
* Average conidiation score of 95 wells of three Biolog FF plates.
† Number of wells that contained conidia (or pustules).
Different letters represent significantly different values (l.s.d. = 0.427 ) (P<0.05).
